# Supplementary material for: On the contrasting morphological response to far-red at high and low photon fluxes
Source: Front Plant Sci. 2023 Jun 2;14:1185622. doi: 10.3389/fpls.2023.1185622 (PMC10274578; doi:10.3389/fpls.2023.1185622)
Supplement: Supplementary file 2 [file Table_1.xlsx]

## Sheet: Leaf area
#	Paper	Species (cv/var)	FR treatment	Leaf area	Measurement	PPFD	Specific FR treatment	Photoperiod	Sup/Sub	Note contrasting data	Comment
1	Robson et al., 1993	Arabidopsis Ler	↑	↓	third pair of lvs	228	R/FR: 7.37 → 0.24	10 h	supplemental	no
		Brassica rapa	↑	↓	?
2	Devlin et al., 1999	Arabidopsis Ler	↑	↓	largest fully grown lf	85	R/FR: 5.64 → 0.15	24 h (continuous)	supplemental	yes - attributed to "growth conditions"
3	Franklin et al., 2003	Arabidopsis Ler	↑	↑	visual	130	R/FR: 4.7 → 0.089	24 h (continuous)	supplemental	yes - attributed to temperature	unquantified
			↑	↓		100	15 min EOD-FR: 57 µmol m-2 s-1	8 h
4	Carabelli et al., 2007	Arabidopsis Col-0	↑	↓	1st lf primordium	?	R/FR: high → low (?)	?		no
5	Boccalandro et al., 2009	Arabidopsis Ler	↑	↑	total plant	250	R/FR: 4.1 → 0.04 [1 h EOD-FR: 10 µmol m-2 s-1 ]	12 h		yes - attributed to "species & growth conditions"
6	Kurepin et al., 2012a	Arabidopsis Col-0	↑	↑	1st lf pair	511	R/FR: 4.31 → 1.23 ("normal") → 0.87	16 h	supplemental	no	NS between "normal" & "high"
7	Kurepin et al., 2012b	Arabidopsis Col-0	↑	↑	1st lf pair	140	R/FR: 4.69 → 1.37 ("normal") → 0.83	16 h	supplemental	yes - attributed to genetics. They have a nice discussion on the topic	From the "normal" R/FR, ↑R/FR ↓LA, ↓R/FR (↓)/NS LA
		Arabidopsis Ler	↑	↑/NS
8	Patel et al., 2013	Arabidopsis Ler	↑	↑/NS	largest fully grown lf (7)	130	R/FR: high → 0.1	8 h	supplemental	yes - attributed to temperature.	Effect depends on temperature. Generally, ↑ at low T
9	Holmes & Smith, 1975	Chenopodium album	↑	↓	?	equal...	R/FR: 13.5 → 0.71	8 h (?)		no	Blue is also probably decreased with ↑ FR
10	Child et al., 1981	Chenopodium album	↑	↑/NS/↓	individual lvs	100	R/FR: 3.34 → 0.26	16 h (?)	supplemental	no	A few ways to look at this data, conclusion: mostly NS
11	Holmes & Smith, 1977	Chenopodium album	↑	↓	primary lf (?)	65/59	R/FR: 0.63 → 0.12/0.05	16 h		no	Blue is also probably decreased with ↑ FR
		Cucurbita pepo cv. 'Mammoth'	↑	↓							The non-FR treatment had a slightly higher PPFD
			↑	↓		195	10 min EOD-FR: 85 µmol m-2 s-1 (R/FR=0.03)	8 h			Comared to EOD R
12	Lopez-Juez et al., 1990	Cucumber (WT, see ref....)	↑	↑	total plant	120	20 min EOD-FR: 14 µmol m-2 s-1	14 h		yes - no theory as to why, but they do mention that there is always a biomass redistribution to stems.
13	Shibuya et al., 2016	Cucumber cv. 'Hokushin'	↑	↑	total plant	300	R/FR: 4.3 → 1.4	16 h	supplemental	no (but they do discuss NAR contradictions)
14	Shibuya et al., 2019	Cucumber cv. 'Hokushin'	↑	↑	total plant	230	7 & 69 µmol m-2 s-1 (3 & 30% FR)	16 h	supplemental	yes - interaction between R:FR and VPD
15	Kusuma & Bugbee, 2021	Cucumber cv. 'Straight eight'	↑	↑	total plant	400	0 & 50 µmol m-2 s-1 (2 & 45% FR) substitution.	16 h	substitution	no	With SUB, %FR calculated differently
16	Kurepin et al., 2010	Tomato cv. 'UC82B'	↑	NS	total plant	168	R/FR: 1.27 → 0.43	16 h	supplemental	yes
17	Kalaitzoglou et al., 2019	Tomato cv. 'Komeett'	↑	↑	total plant	149	4 treatments. 0 - 154 µmol m-2 s-1 (0 - 103% FR)	16 h	supplemental	Yes, mainly citing Demotes-Mainard et al. (2016)
18	Zhang et al., 2020	Tomato cv. 'Micro Tom'	↑	NS	Total plant (+ lf #)	180	8 treatments. 0 - 40 µmol m-2 s-1 (0 - 22% FR)	18 h	supplemental	They do not discuss the relation of far-red to leaf expansion, but they do discuss the relationsship between blue and leaf expansion, saying effects depends on PPFD, species and amount of blue.	high and low blue
		Geranium cv. 'Pinto Premium Orange'	↑	NS
		Petunia cv. 'Wave Blue'	↑	NS
		Snapdragon cv. 'Liberty Classic Yellow'	↑	NS
		Impatiens cv. 'Super Elfin XP Red'	↑	NS
		Dianthus cv. 'Jolt Cherry'	↑	NS
		Coleus cv. 'Wizard Golden'	↑	NS
		Marigold cv. 'Antigua Orange'	↑	NS
		Zinnia cv. 'Magellan Pink'	↑	NS
19	Park & Runkle, 2017	Geranium cv. 'Pinto Premium Orange'	↑	↑	Total plant	160, (128,96)	6 treatments. 0 - 64 µmol m-2 s-1 (0 - 40% FR). Substitution: 0 - 67%	18 h	supplemental + substitution	Yes, mainly citing Demotes-Mainard et al. (2016) for the statement that increases/decreases depend on growth conditions and species. Also not shade avoidance vs tolerance.
		Petunia cv. 'Wave Blue'	↑	NS
		Snapdragon cv. 'Trailing Candy'	↑	↑
		Impatiens cv. 'Super Elfin XP Red'	↑	NS
20	Park & Runkle, 2018	Geranium cv. 'Pinto Premium Orange'	↑	NS/NS		96 & 288	6 treatments. 0 - 256 µmol m-2 s-1 (0 - 89% FR) at high PPFD, 0 - 64 µmol m-2 s-1 (0 - 67% FR) at low	18 h	supplemental	Yes - attributed to PPFD, species and cultivar. Zou et al. (2019) appears to have partially copied there discussion here. (good citations)	total blue equal in all treatments
		Petunia cv. 'Wave Blue'	↑	NS/↑	Total plant (+ lf #)						"/" indicates with low/high PPFD
		Coleus cv. 'Wizard Golden'	↑	↑/NS
21	Park & Runkle, 2019	Geranium cv. 'Pinto Premium Orange'	↑	↑/↑	Total plant (+ lf #)	160	6 treatments. 0 - 160 µmol m-2 s-1 (0 - 100% FR)	18 h	supplemental	yes - but only noting their own data. They mention biomass redistributions to stems under certain conditions.	"/" indicates with blue/without blue. Some difference between effect of R:FR on Petunia on the total vs individual lf basis.
		Petunia cv. 'Wave Blue'	↑	↑/NS
		Coleus cv. 'Wizard Golden'	↑	↑/↓
22	Casal et al., 1987	Petunia axilaris	↑	↑	Total plant (+ largest lf)	180	20/90 min EOD-FR: 52/8 µmol m-2 s-1	10 h		Yes - species differences and biomass allocation	Compared to EOD R. Increased in all cases.
23	Lee et al., 2015	lettuce cv. 'Sunmang'	↑	NS	Total plant (+ lf #)	132	5 treatments. 0 - 188 µmol m-2 s-1 (0 - 142% FR)	12 h (?)	supplemental	no	no blue
24	Lee et al., 2016	lettuce cv. 'Sunmang'	↑	↑	Total plant (+ lf #)	130	5 treatments. 0 - 150 µmol m-2 s-1 (0 - 115% FR)	12 h (?)	supplemental	no
25	Zou et al., 2019	Lettuce cv. 'Tiberius'	↑	↑	Total plant	200	0 & 50 µmol m-2 s-1 (0 & 25% FR)	16 h	supplemental	yes - attribute increases to high PPFD and decrease to low PPFD (*)	*They include citations for this statement, but the citations don't support the statement.
			↑	↑			1 h 50 µmol m-2 s-1 EOD FR
26	Zou et al., 2021	Lettuce cv. 'Tiberius'	↑	↑	Total plant	200	6 treatments. 30 min 0 - 100 µmol m-2 s-1 EOD FR	16 h	supplemental	Yes, mainly citing Demotes-Mainard et al. (2016)
			↑	↑			1 h 50 µmol m-2 s-1 EOD FR				Applied during or after the end of the photoperiod
27	Zhen & Bugbee, 2020a	Lettuce cv. 'Waldmanns Dark Green'	↑	↑	Total plant	350	0 & 50 µmol m-2 s-1 (0 & 16% FR) substitution.	14 h	substitution	Not really, species sensitivity is noted	With SUB, %FR calculated differently
28	Legendre & van Iersel, 2021	Lettuce cv. 'Green Salad Bowl'	↑	↑	Total plant	111 - 245	4.7 - 32.8 µmol m-2 s-1	18 h	supplemental + substitution	No - but they do mention decreases in yield under high PPFD	Gradient Chamber
			↑	↑		207	4.9 - 28 µmol m-2 s-1				They don't seem to directly relate FR to leaf area.
29	Jin et al., 2021	Lettuce cv. 'Expertise RZ'	↑	↑	Total plant	218	0 & 52 µmol m-2 s-1 (2 & 24% FR)	18 h	supplemental	no
30	Kong & Nemali, 2021	Lettuce cv. 'Amadeus'	↑	↓	Total plant	135	0 & 17 µmol m-2 s-1 (2 & 12% FR)	24 h (continuous)	substitution	no	Significantly fewer lvs in the FR treated.
			↑	↑	single leaf
31	Frankland & Letendre, 1978	Circaea lutetiana	↑	↓	Total plant	7 W/m2	R/FR: 1.06 → 0.47	16 h	supplemental	no
			↑	↓		29 W/m2	15 min EOD-FR: ? µmol m-2 s-1	12 h
32	Kwesiga & Grace, 1986	Khaya senegalensis	↑	↓	Total plant (+ lf #)	18, 125, 250	R/FR: 1.7 → low (0.14 - 0.59)	12 h	supplemental	yes - attributed to species differences	Trees
		Terminalia ivorensis	↑	↑
33	Pausch et al., 1991	Glycine max cv. 'Williams'	↑	NS/↑	Total plant	230	4 & 52 µmol m-2 s-1 (2 & 23% FR)	14 h	supplemental	yes	NS for unifoliate, ↑ for first trifoliate
34	Barreiro et al., 1992	Bean cv. 'Balin de Albenga'	↑	NS	Total plant (?)	800	R/FR: 1.3 → 0.7	12 h	supplemental	no	There were significant effects in thickness. And, High PPFD had an decreased LA relative to low+FR
			↑	NS		300
35	Miyashita et al., 1994	Potato cv. 'Benimaru'	↑	NS	Total plant	100 - 200	2 - 50 µmol m-2 s-1 (0 & 50% FR)	16 h	supplemental	no
36	Heraut-Bron et al., 1999	Trifolium repens cv. 'Huia'	↑	↑	single lf (I think)	320	R/FR: 2.4 → 0.4	10 h	supplemental	no
			↑	NS		110
37	Kurepin et al., 2007a	sunflower (6946)	↑	↑/↓	Youngest leaf pair	157	R/FR: 4.52/4.73 → 1.36/1.42 ("normal") → 0.85/0.87 (low/high PPFD)	16 h	supplemental	They note their own contrasting data (interaction with PAR), but don't speculate much further.	Both ↑ relative to "normal"
			↑	↑		421					NS between "normal" & "low"
38	Kurepin et al., 2007b	Brassica napus cv. 'Westar'	↑	↓	1st & 2nd lvs	124	R/FR: 4.31 → 0.83	16 h	supplemental	no
39	Kurepin et al., 2006	Stellaria longipes (alpine/dwarf/sun/1D)	↑	NS	Leaf pair below 3rd internode	115	R/FR: 2.7 → 1.9 ("normal") → 0.7	16 h (?)	supplemental	yes - genetics	Also have PAR treatments showing ↓ PAR ↑ LA in 7B
		Stellaria longipes (prarie/tall/shade/7B)	↑	↑
40	Bae et al., 2017	Crepidiastrum denticulatum	↑	↑	Total plant	130	4 treatments. 0 - 150 µmol m-2 s-1 (0 - 115% FR)	16 h (?)	supplemental	no
41	Qaderi et al., 2015	Oenothera biennis	↑	↓	Total plant (+ lf #)	300	R/FR: 1.35 → 0.57	16 h	supplemental	no
